# Supplementary material for: The Doublesex/Mab-3 domain transcription factor DMD-10 regulates ASH-dependent behavioral responses
Source: PeerJ. 2021 Feb 25;9:e10892. doi: 10.7717/peerj.10892 (PMC7916532; doi:10.7717/peerj.10892)
Supplement: Supplemental Information 1 [file peerj-09-10892-s001.xlsx]

## Sheet: B body bends
WT	egl-10	dmd-10
103	8	143
142	8	144
128	16	158
191	14	183
199	27	192
218	19	192
253	8	195
190	10	186
189	30	173
200	20	234
223	17	190
229	23	193
192	19	204
247	11	222
215	17	258
190	16	230
235	10	219
232	12	149
222	14	232
211	9	218
197		240
241		226
230		238
252		234
227		236
242		245
229		220
206		228
225		246
258		255

## Sheet: C Egg laying
WT	tph-1	dmd-10
3.83333	2.3	3.7
4.55	3	5.25
5.6	2.9	4.66667
2.83333	1.46667	2.03333
4.6	3.3	4.53333
3.56667	3.83333	6.23333
6.73	4.06667	5.93333
6.3	3.96667	5.5
6.03333	2.36667	5.5
