# Supplementary material for: The Doublesex/Mab-3 domain transcription factor DMD-10 regulates ASH-dependent behavioral responses
Source: PeerJ. 2021 Feb 25;9:e10892. doi: 10.7717/peerj.10892 (PMC7916532; doi:10.7717/peerj.10892)
Supplement: Supplemental Information 2 [file peerj-09-10892-s002.xlsx]

## Sheet: A DA CI
WT	dmd-10	odr-10
0.483	0.822	-0.016
0.678	0.945	0.026
0.795	0.584	-0.135
0.845	0.64	-0.132
0.797	0.653	0.104
0.779	0.672	0.092
0.673	0.761	-0.144
0.834	0.775
0.625	0.818
0.698	0.727
0.72	0.469
	0.695

## Sheet: B IA CI
WT	dmd-10	odr-10
0.462	0.333	0.86
0.217	0.533	0.367
0.598	0.327	0.514
0.936	0.631	0.417
0.805	0.811

## Sheet: C % touch response
WT	dmd-10	mec-10
100	100	50
100	100	50
90	100	50
100	100	40
100	100	50
100	100	50
100	100	40
100	100	40
100	100	40
100		50
		50
