# Supplementary material for: The Doublesex/Mab-3 domain transcription factor DMD-10 regulates ASH-dependent behavioral responses
Source: PeerJ. 2021 Feb 25;9:e10892. doi: 10.7717/peerj.10892 (PMC7916532; doi:10.7717/peerj.10892)
Supplement: Supplemental Information 3 [file peerj-09-10892-s003.xlsx]

## Sheet: Sheet1
WT	glr-1	dmd-10(gk1131)	dmd-10(gk1132)
100	0	60	90
100	0	80	100
100	0	60	50
100	0	80	60
90	0	70	90
90	0	70	50
100	0	70	70
90	0	70	100
100	0	70	70
100	0	50	50
100	0	50	70
90	0	40	70
100	0	40	80
90	0	40	40
100	0	60	90
100	0	60	70
90	0	60	40
100	0	70	90
90	0	70	80
100	0	80	70
100	0	70	40
90	0	70	20
100	0	60	60
90	0	70	50
100	0	60	60
100	0	60	70
90	0	40	40
100	0	80	90
90	0	70	80
100	0	60	90
100	0	50	70
90	0	60	60
90	0	70	80
80	0	60	80
100	0	30	70
90	0	70	60
100	0	50	80
100	0	70	100
100	0	60	80
90	0	90	100
90	0	100	80
90	0	80	80
80	0	100	90
100	0	100	100
80	0	90	90
90	0	90
90	0	90
100	0	80
80	0	80
90	0	100
100	0	80
100	0	70
90	0	100
100	0	70
100	0	70
100	0	80
100	0	80
100	0	80
100	0	70
90	0	80
100	0	70
100	0	100
100	0	80
90	0	80
100	0	90
100	0	100
100	0	90
100	0	70
100	0	90
100	0	60
100	0	70
100	0	90
90	0	80
100	0	80
100	0	100
90	0	90
100	0	90
100	0	80
100	0	100
100	0	90
100	0	100
100	0	90
90	0	90
100	0	80
100	0	80
100	0	100
90	0	80
100	0	100
100	0	100
100	0	60
100	0	90
100	0	70
	0	100
	0	90
	0	90
	0	90
	0	80
	0	80
		100
		80
		100
		90
		80
		100
		80
		100
		100
		90
		100
		100
		100
		90
		70
		90
		100
		100
