# Supplementary material for: The Doublesex/Mab-3 domain transcription factor DMD-10 regulates ASH-dependent behavioral responses
Source: PeerJ. 2021 Feb 25;9:e10892. doi: 10.7717/peerj.10892 (PMC7916532; doi:10.7717/peerj.10892)
Supplement: Supplemental Information 4 [file peerj-09-10892-s004.xlsx]

## Sheet: B Puncta intensity
WT			dmd-10
Mean	SEM	N	Mean	SEM	N
194.208	11.3675	23	194.165	11.6966	23

## Sheet: C Puncta width
WT			dmd-10
Mean	SEM	N	Mean	SEM	N
0.875957	0.0296128	23	0.880496	0.0323922	24

## Sheet: D Puncta density
D			dmd-10
Mean	SEM	N	Mean	SEM	N
2.85236	0.0991755	23	2.9749	0.106573	24

## Sheet: E Spontaneous revs
WT	dmd-10
4.6	9
4.6	10
3.8	6.2
3.8	9.4
6.4	7.4
11.4	6.2
11.6	12
12.2	7.4
6	6.8
9	9.2
3.4	15.6
4.2	8
5.8	4.2
9.4	12.6
	3.6
