# Supplementary material for: The Doublesex/Mab-3 domain transcription factor DMD-10 regulates ASH-dependent behavioral responses
Source: PeerJ. 2021 Feb 25;9:e10892. doi: 10.7717/peerj.10892 (PMC7916532; doi:10.7717/peerj.10892)
Supplement: Supplemental Information 5 [file peerj-09-10892-s005.xlsx]

## Sheet: A high osmolarity
WT	osm-10	dmd-10	glr-1
100	0	100	90
100	0	100	100
100	0	100	100
100	0	90	100
100	0	90	100
100	0	100	90
100	10	70	100
100	20	80	100
100	0	90	100
100	0	80	100
100	0	100	100
100	0	100	100
100	10	100	90
90	0	100	100
100	20	90	100
100	10	100	100
90	10	100	100
100	0	70	100
100	0	80	100
100	0	80	90
100	0	100	100
100	10	90	100
100	0	100	100
100	0	100	100
100	0	100	100
100	0	90	100
100	10	80	100
100	0	100	100
100	0	100	100
100	0	100	100
100	0	100
100	0	100
100	0	100
100	0	100
100	0	90
100
100
100
100

## Sheet: B OptoASH
WT	eat-4	dmd-10
80	0	50
70	0	10
90	0	0
50	0	20
80	0	50
60	0	50
50	0	30
100	10	70
70	20	60
70	0	90
70	0	20
90	0	60
50	0	90
90	10	0
60	0	20
90	0	30
100	0	50
100	0	20
100	0	10
100	0	30
50	0	30
80	10	50
90	0	90
60	0	0
80	0	80
		40
